# Supplementary material for: Optimized DNA electroporation for primary human T cell engineering
Source: PubMed Central journal article supplement (PMC5789706; doi:10.1186/s12896-018-0419-0), 2018-01-30
Supplement: 12896_2018_419_MOESM3_ESM.pdf [file 12896_2018_419_MOESM3_ESM.pdf]

a

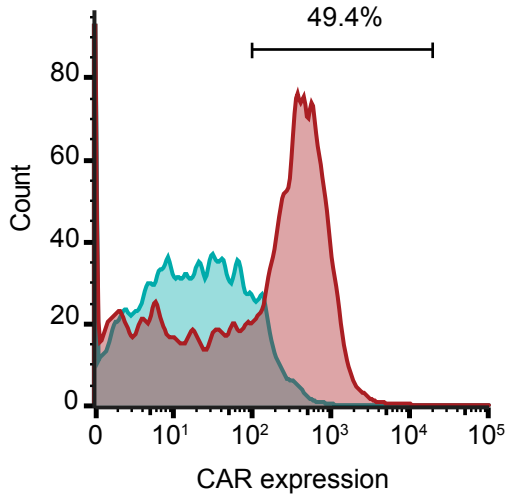

b

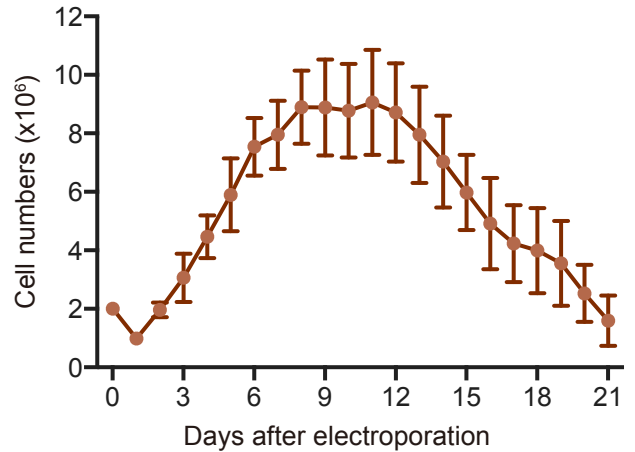

c

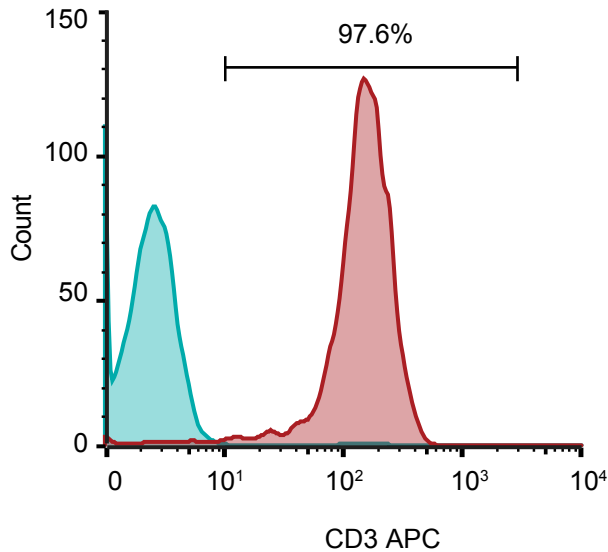

**Supplementary Fig. 3** Transgene expression and proliferation of CAR-T cells.

**a** Red peak, electro-transfected T cells; green peak, untreated T cells. **b** Proliferation of CAR-T cells.

**c** Red peak, APC anti-human CD3 stained cells; green peak, isotype control stained cells.
